# Supplementary material for: Physiological Function of Rac Prophage During Biofilm Formation and Regulation of Rac Excision in Escherichia coli K-12
Source: PubMed Central journal article supplement (PMC4632033; doi:10.1038/srep16074), 2015-11-04
Supplement: srep16074-s1.pdf [file srep16074-s1.pdf]

## Supplementary File

### Physiological Function of Rac Prophage During Biofilm Formation and Regulation of Rac Excision in *Escherichia coli* K-12

Xiaoxiao Liu<sup>1,+</sup>, Yangmei Li<sup>1,2,+</sup>, Yunxue Guo<sup>1</sup>, Zhenshun Zeng<sup>1,2</sup>, Baiyuan Li<sup>1,2</sup>, Thomas K. Wood<sup>3,4</sup>, Xingsheng Cai<sup>1</sup>, Xiaoxue Wang<sup>1,\*</sup>

<sup>1</sup>Key Laboratory of Tropical Marine Bio-resources and Ecology, Guangdong Key Laboratory of Marine Materia Medica, RNAM Center for Marine Microbiology, South China Sea Institute of Oceanology, Chinese Academy of Sciences, Guangzhou 510301, PR China,

<sup>2</sup>University of Chinese Academy of Sciences, Beijing 100049, China,

<sup>3</sup>Department of Chemical Engineering, <sup>4</sup>Department of Biochemistry and Molecular Biology, Pennsylvania State University, University Park, Pennsylvania 16802-4400

\*Correspondence and requests for materials should be addressed to [xxwang@scsio.ac.cn](mailto:xxwang@scsio.ac.cn)

<sup>+</sup>These authors contributed equally to this work.

**Table S1.** Mass spectrometry results of the purified YdaQ protein used in Fig. 7D. Peptide fragments observed were highlighted in different colors, and their loci in YdaQ protein were also shown.

Matched Protein ID : gi|90111254|ref|NP\_415862.4| Description: Rac prophage; conserved protein [*Escherichia coli* str. K-12 substr. MG1655] >gi|90111254|

Amino acid (aa) sequence: MAQVIFNEEWMVEYGLMLRTGLGARQIEAYRQNCWVEGFHFKRVSP L GKPDSKRGIIWYNYPKINQFIKDS

| Num | Query_ID | Pep_exp_mz | Pep_exp_mr | Pep_calc_mr | Pep_ms_delta | Start position | end position | Miss | Icon_score | E-value     | aa before | Peptide            | aa after | Retention_time |
|-----|----------|------------|------------|-------------|--------------|----------------|--------------|------|------------|-------------|-----------|--------------------|----------|----------------|
| 1   | 5666     | 395.23     | 1182.67    | 1182.67     | -0.0046      | 44             | 54           | 1    | 56.5       | 8.95E-06    | R         | VSPLGKPDSKR        | G        | 6.4            |
| 2   | 3015     | 482.76     | 963.5      | 963.5       | -0.0048      | 64             | 71           | 1    | 27.27      | 0.016312452 | K         | INQFIKDS           | -        | 18.87          |
| 3   | 5153     | 577.3      | 1152.59    | 1152.6      | -0.003       | 55             | 63           | 0    | 43.86      | 0.000265192 | R         | GIIWYNYPK          | I        | 42.9           |
| 4   | 1728     | 390.2      | 778.39     | 778.4       | -0.0053      | 26             | 31           | 0    | 39.46      | 0.001239978 | R         | QIEAYR             | Q        | 7.93           |
| 5   | 7414     | 437.24     | 1308.7     | 1308.7      | -0.0011      | 54             | 63           | 1    | 39.47      | 0.000581845 | K         | RGIIWYNYPK         | I        | 23.77          |
| 6   | 10576    | 402.69     | 1606.75    | 1606.75     | -0.0006      | 32             | 43           | 1    | 69.84      | 6.90E-07    | R         | QNCWVEGFHFKR       | V        | 22.7           |
| 7   | 12591    | 754.04     | 2259.09    | 2259.07     | 0.0179       | 2              | 19           | 0    | 34.86      | 0.002057503 | M         | AQVIFNEEWMVEYGLMLR | T        | 41.58          |
| 8   | 1614     | 381.73     | 761.44     | 761.44      | -0.0049      | 64             | 69           | 0    | 45.25      | 0.000213455 | K         | INQFIK             | D        | 13.12          |
| 9   | 11714    | 633.02     | 1896.03    | 1896.03     | 0.0016       | 55             | 69           | 1    | 45.86      | 7.91E-05    | R         | GIIWYNYPKINQFIK    | D        | 35.98          |
| 10  | 7689     | 445.91     | 1334.7     | 1334.69     | 0.0051       | 20             | 31           | 1    | 23.9       | 0.030960901 | R         | TGLGARQIEAYR       | Q        | 14.1           |
| 11  | 8827     | 484.88     | 1451.63    | 1451.63     | -0.0016      | 32             | 42           | 0    | 36.14      | 0.001058009 | R         | QNCWVEGFHFK        | R        | 29.48          |
| 12  | 3713     | 514.29     | 1026.56    | 1026.57     | -0.0066      | 44             | 53           | 0    | 50.76      | 4.78E-05    | R         | VSPLGKPDSK         | R        | 6.95           |
| 13  | 1608     | 381.69     | 761.37     | 761.37      | -0.0036      | 26             | 31           | 0    | 27.43      | 0.019607839 | R         | QIEAYR             | Q        | 15.98          |
| 14  | 10582    | 402.94     | 1607.73    | 1607.73     | -0.0033      | 32             | 43           | 1    | 53.34      | 2.76E-05    | R         | QNCWVEGFHFKR       | V        | 24.57          |

**Table S2.** Nucleotide sequences of primers used in this study. Restriction enzyme sites are underlined. F indicates forward primer and R indicates reverse primer. Primers used in qPCR used in this study are the same as previously described<sup>1</sup>.

| <b>Primer Name/Purpose</b>        | <b>Primer Sequence (listed 5' to 3')</b>                |
|-----------------------------------|---------------------------------------------------------|
| <b>DNA cloning and sequencing</b> |                                                         |
| pCA24N- <i>ttcA</i> -F            | GCCCAAGAAAATCAACAAATTACAAAGAAAG                         |
| pCA24N- <i>ttcA</i> -R            | CCTTTCACCTTCAACCACATTCAGC                               |
| pCA24N- <i>ttcA</i> '-F           | CCCTCGCAAATCAAGAAATTAGTAAGAAAG                          |
| pCA24N-F                          | GATAACAATTTACACAGAATT                                   |
| pCA24N-R                          | GTCAGAGGTTTTACCGTCATCA                                  |
| pET28b- <i>xisR</i> -F            | CTAGCCATGGGCAGCAGCCATCATCATCATCACGCACAAGTAATCTTTAATGAAG |
| pET28b- <i>xisR</i> -R            | CCCAAGCTTTCATGAGTCTTTGATAAACTGATT                       |
| pET28b- <i>hns</i> -F             | CTAGCCATGGGCATGAGCGAAGCACTTAAAATTCTGAA                  |
| pET28b- <i>hns</i> -R             | CCCAAGCTTTTAGTGGTGGTGGTGGTGGTGGTGTGCTTGATCAGGAAATCGTC   |
| T7-F                              | TAATACGACTCACTATAGGG                                    |
| T7-R                              | TATGCTAGTTATTGCTCAG                                     |
| <b>Amplify fragments for EMSA</b> |                                                         |
| rac attR-F                        | TTTGGAATTTTTTCGGTGG                                     |
| rac attR-R                        | AGATTTCTTATGCTGGGCG                                     |
| rac attM-F                        | CTATATGCCTTTGATGCGGAG                                   |
| rac attM-R                        | GTAAGGGCAAAAATCACAACTC                                  |
| <b>qPCR</b>                       |                                                         |
| e14-F                             | GTGCAAACATCGGTGACGAA                                    |
| e14-R                             | TTCAGCAGCTTAGCGCCTTC                                    |
| rac-F                             | CTCCAGCATGGTATAGCTGTCTTTAC                              |

|                |                           |
|----------------|---------------------------|
| rac-R          | CAGATTTCTTATGCTGGGCGTTCCG |
| CP4-6-F        | GCATCGCCCGGTTAGTTTTA      |
| CP4-6-R        | CACCTGCACTGCCTGATGTC      |
| CPS-53-F       | CGTACTTACCCCGCACTCCA      |
| CPS-53 -R      | GGCAGTGGCCAAAAATTGAA      |
| DLP12-F        | CAAAAGCCATTGACTCAGCAAGG   |
| DLP12-R        | ACGGATAAGACGGGCATAAATGA   |
| CPZ-55-F       | AGCACATCCCCCGAACG         |
| CPZ-55-R       | TTGACGAAGTGATTGTCCGC      |
| CP4-57- F      | AAGCATGTAGTACCGAGGATGTAGG |
| CP4-57-R       | TATGTCTCCTCACCGTCTGGTCGG  |
| purA-F         | GGGCCTGCTTATGAAGATAAAGT   |
| purA-R         | TCAACCACCATAGAAGTCAGGAT   |
| <b>qRT-PCR</b> |                           |
| xisR qPCR-F    | TGGTTGAATACGGCCTGATG      |
| xisR qPCR-R    | GTACCAGATAATCCCTCGTTTGCT  |
| rrsG-qPCR-F    | TATTGCACAATGGGCGCAAG      |
| rrsG-qPCR-R    | ACTTAACAAACCGCTGCGT       |

---

## Reference

1. Wang, X. *et al.* Cryptic prophages help bacteria cope with adverse environments. *Nat. Commun.* **1**, 147 (2010).
